# Supplementary material for: Distribution and clinical impact of molecular subtypes with dark zone signature of DLBCL in a Japanese real-world study
Source: PubMed Central journal article supplement — Blood Adv. 2023 Aug 10;7(24):7459–70. doi: 10.1182/bloodadvances.2023010402 (PMC10758740; doi:10.1182/bloodadvances.2023010402), 2023-08-10
Supplement: BLOODA_ADV-2023-010402-mmc2.pdf [file BLOODA_ADV-2023-010402-mmc2.pdf]

### Supplemental Table 1. Antibodies for immunohistochemical staining

| Antigen | Antibody Clone | Manufacturer |
|---------|----------------|--------------|
| CD20    | L26            | Leica        |
| BCL2    | bcl2/100/D5    | Novocastra   |
| MYC     | EP121          | Genetex      |
| CD10    | 56C6           | Leica        |
| BCL6    | LN22           | Novocastra   |
| MUM1    | MUM1p          | DAKO         |
| CD3     | LN10           | Leica        |
| CD4     | IF6            | Nichirei     |
| CD8     | C8/144B        | Nichirei     |
| CD31    | 1A10           | Leica        |
| CD68    | PGM1           | DAKO         |

### Supplemental Table 2. FISH probes

| Probe Name                | Manufacturer | Catalogue Number |
|---------------------------|--------------|------------------|
| Vysis LSI MYC Dual Color  | Abbott       | 5J91-01          |
| Vysis LSI BCL2 Dual Color | Abbott       | 7J75-01          |

Abbreviations: FISH: fluorescent in situ hybridization

**Supplemental Table 4. Patient characteristics of final cohort and excluded cohort**

|                           | Final cohort | Excluded cohort | <i>P</i> value |
|---------------------------|--------------|-----------------|----------------|
| Number of patients        | 1050         | 526             |                |
| Age (n, %)                |              |                 |                |
| Median                    | 72           | 72              |                |
| <61                       | 183 (17.4)   | 104 (19.8)      | 0.268          |
| ≥61                       | 867 (82.6)   | 422 (80.2)      |                |
| Sex (n, %)                |              |                 |                |
| Male                      | 591 (56.3)   | 290 (55.1)      | 0.667          |
| Female                    | 459 (43.7)   | 236 (44.9)      |                |
| Performance Status (n, %) |              |                 |                |
| 0-1                       | 853 (82.4)   | 382 (79.6)      | 0.2            |
| 2-4                       | 182 (17.6)   | 98 (20.4)       |                |
| NA                        | 15           | 46              |                |
| Stage (n, %)              |              |                 |                |
| I/II                      | 472 (45)     | 223 (45.1)      | 1              |
| III/IV                    | 578 (55)     | 272 (54.9)      |                |
| NA                        | 0            | 31              |                |
| LDH (n, %)                |              |                 |                |
| Normal                    | 399 (38)     | 179 (37.4)      | 0.865          |
| >ULN                      | 650 (62)     | 299 (62.6)      |                |
| NA                        | 1            | 48              |                |
| Extranodal sites (n, %)   |              |                 |                |
| 0-1                       | 830 (79)     | 377 (77.9)      | 0.639          |
| ≥2                        | 220 (21)     | 107 (22.1)      |                |
| NA                        | 0            | 42              |                |
| Biopsy site (n, %)        |              |                 |                |
| Nodal                     | 560 (53.3)   | 179 (34.4)      | <0.0001        |
| Extranodal                | 490 (46.7)   | 342 (65.6)      |                |
| IPI risk group (n, %)     |              |                 |                |
| Low (0-1)                 | 289 (27.9)   | 143 (30.6)      | 0.241          |
| Low-Intermediate (2)      | 264 (25.5)   | 106 (22.7)      |                |
| High-Intermediate (3)     | 253 (24.5)   | 101 (21.6)      |                |
| High (4-5)                | 228 (22.1)   | 117 (25.1)      |                |
| NA                        | 16           | 59              |                |

Abbreviations: LDH: lactate dehydrogenase, IPI: International Prognostic Index,  
NA: not available, ULN: upper limit of normal

**Supplemental Table 5. Patient characteristics of the present cohort and BCC cohort**

|                           | <b>Present cohort</b> | <b>BCC</b> | <b>P value</b> |
|---------------------------|-----------------------|------------|----------------|
| Number of patients        | 1050                  | 804        |                |
| Age (n, %)                |                       |            |                |
| Median                    | 72                    | 66         |                |
| <61                       | 183 (17.4)            | 239 (29.7) | <0.001         |
| ≥61                       | 867 (82.6)            | 565 (70.3) |                |
| Sex (n, %)                |                       |            |                |
| Male                      | 591 (56.3)            | 453 (56.3) | 1              |
| Female                    | 459 (43.7)            | 351 (43.7) |                |
| Performance Status (n, %) |                       |            |                |
| 0-1                       | 853 (82.4)            | 447 (61.5) | <0.001         |
| 2-4                       | 182 (17.6)            | 280 (38.5) |                |
| NA                        | 15                    | 77         |                |
| Stage (n, %)              |                       |            |                |
| I/II                      | 472 (45)              | 345 (46.2) | 0.631          |
| III/IV                    | 578 (55)              | 402 (53.8) |                |
| NA                        | 0                     | 57         |                |
| LDH (n, %)                |                       |            |                |
| Normal                    | 399 (38)              | 348 (53.3) | <0.001         |
| >ULN                      | 650 (62)              | 305 (46.7) |                |
| NA                        | 1                     | 151        |                |
| Extranodal sites (n, %)   |                       |            |                |
| 0-1                       | 830 (79)              | 591 (79.1) | 1              |
| ≥2                        | 220 (21)              | 156 (20.9) |                |
| NA                        | 0                     | 57         |                |
| IPI risk group (n, %)     |                       |            |                |
| Low (0-1)                 | 289 (27.9)            | 225 (34.1) | 0.104          |
| Low-Intermediate (2)      | 264 (25.5)            | 157 (23.8) |                |
| High-Intermediate (3)     | 253 (24.5)            | 141 (21.4) |                |
| High (4-5)                | 228 (22.1)            | 136 (20.6) |                |
| NA                        | 16                    | 145        |                |

Abbreviations: BCC: BC Cancer, LDH: lactate dehydrogenase,

IPI: International Prognostic Index, NA: not available, ULN: upper limit of normal

**Supplemental Table 6. Difference of biopsies obtained from nodal or extranodal sites according to refined cell-of-origin**

|                    | GCB        | DZsig <sup>pos</sup> | ABC        | UNC     | P value |
|--------------------|------------|----------------------|------------|---------|---------|
| Biopsy site (n, %) |            |                      |            |         |         |
| Nodal              | 170 (46.3) | 39 (60)              | 270 (57.7) | 81 (54) | 0.0074  |
| Extranodal         | 197 (53.7) | 26 (40)              | 198 (42.3) | 69 (46) |         |

Abbreviations: ABC: activated B-cell-like, DZsig<sup>pos</sup>: dark zone signature positive, GCB: germinal center B-cell-like, UNC: unclassified

**Supplemental Table 7. Univariable analysis including refined cell-of-origin and IPI groups**

| Variables                                            | Progression free survival |         | Overall survival  |         |
|------------------------------------------------------|---------------------------|---------|-------------------|---------|
|                                                      | HR (95% CI)               | P value | HR (95% CI)       | P value |
| DZsig <sup>pos</sup> vs GCB                          | 2.96 (2.01-4.36)          | <0.001  | 2.80 (1.74-4.50)  | <0.001  |
| ABC vs GCB                                           | 1.99 (1.56-2.54)          | <0.001  | 2.12 (1.57-2.86)  | <0.001  |
| UNC vs GCB                                           | 1.69 (1.23-2.31)          | 0.001   | 1.66 (1.12-2.46)  | 0.012   |
| IPI (High/High-intermediate vs Low/Low-intermediate) | 2.75 (2.24-3.39)          | <0.001  | 2.587 (2.01-3.33) | <0.001  |

Abbreviations: ABC: activated B-cell-like, DZsig<sup>pos</sup>: dark zone signature positive, GCB: germinal center B-cell-like, UNC: unclassified, IPI: International Prognostic Index

**Supplemental Table 8. Primary refractory status according to refined cell-of-origin**

|                       | GCB       | DZsig <sup>pos</sup> | ABC       | UNC       |
|-----------------------|-----------|----------------------|-----------|-----------|
| Number of patients    | 72        | 28                   | 164       | 52        |
| Relapse timing (n, %) |           |                      |           |           |
| <9 months             | 32 (44.4) | 19 (67.9)            | 81 (49.4) | 21 (40.4) |
| ≥9 months             | 40 (55.6) | 9 (32.1)             | 83 (50.6) | 31 (59.6) |

Abbreviations: ABC: activated B-cell-like, DZsig<sup>pos</sup>: dark zone signature positive, GCB: germinal center B-cell-like, UNC: unclassified

## Supplemental Figure 1

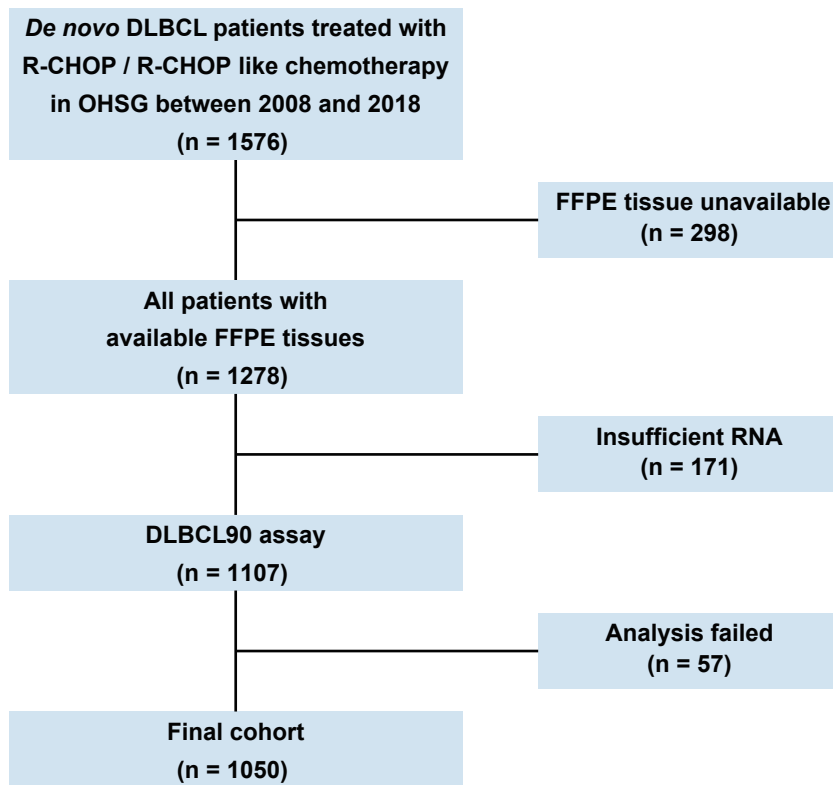

**Supplemental Figure 1: Flowchart of the diffuse large B-cell lymphoma study cohort.**

FFPE: formalin-fixed paraffin-embedded, OHSG: Okayama hematology study group, R-CHOP: rituximab, cyclophosphamide, doxorubicin, vincristine, and prednisone

## Supplemental Figure 2

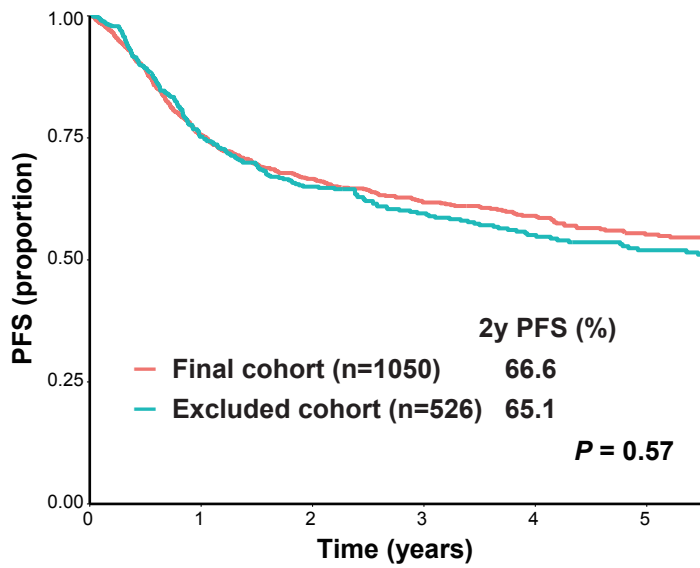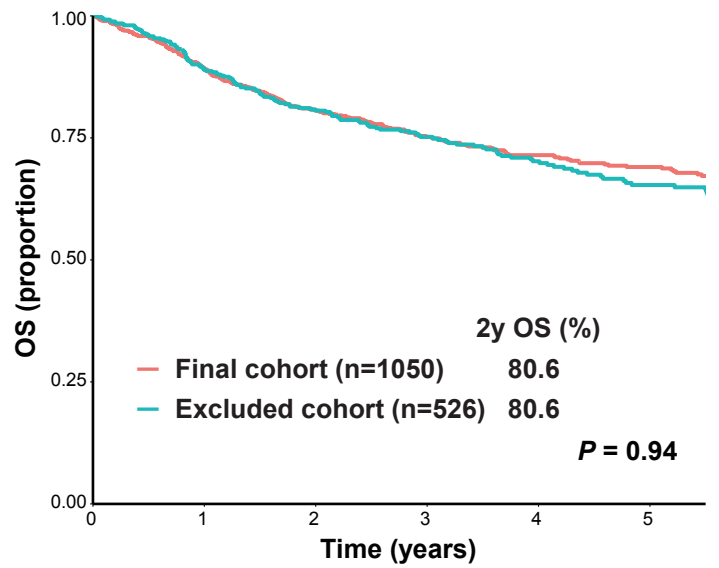

**Supplemental Figure 2: Clinical outcomes of patients with diffuse large B-cell lymphoma stratified by the availability of gene expression profiling (GEP) data.** Final cohort includes patients with GEP data, and excluded cohort consists of patients who were not included due to reasons shown in Figure S1.

# Supplemental Figure 3

## Model 1

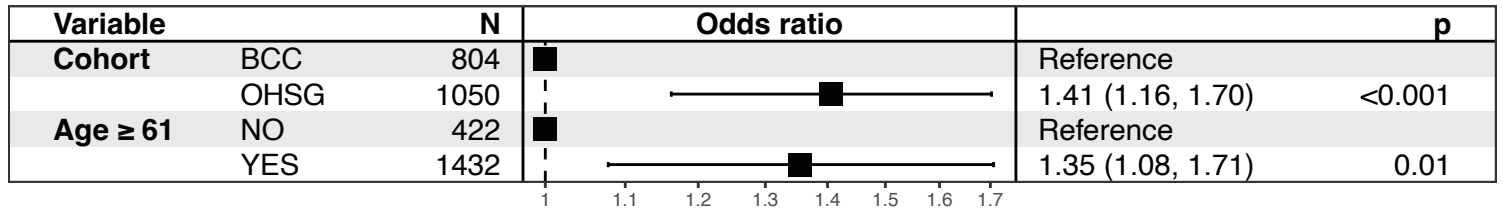

## Model 2

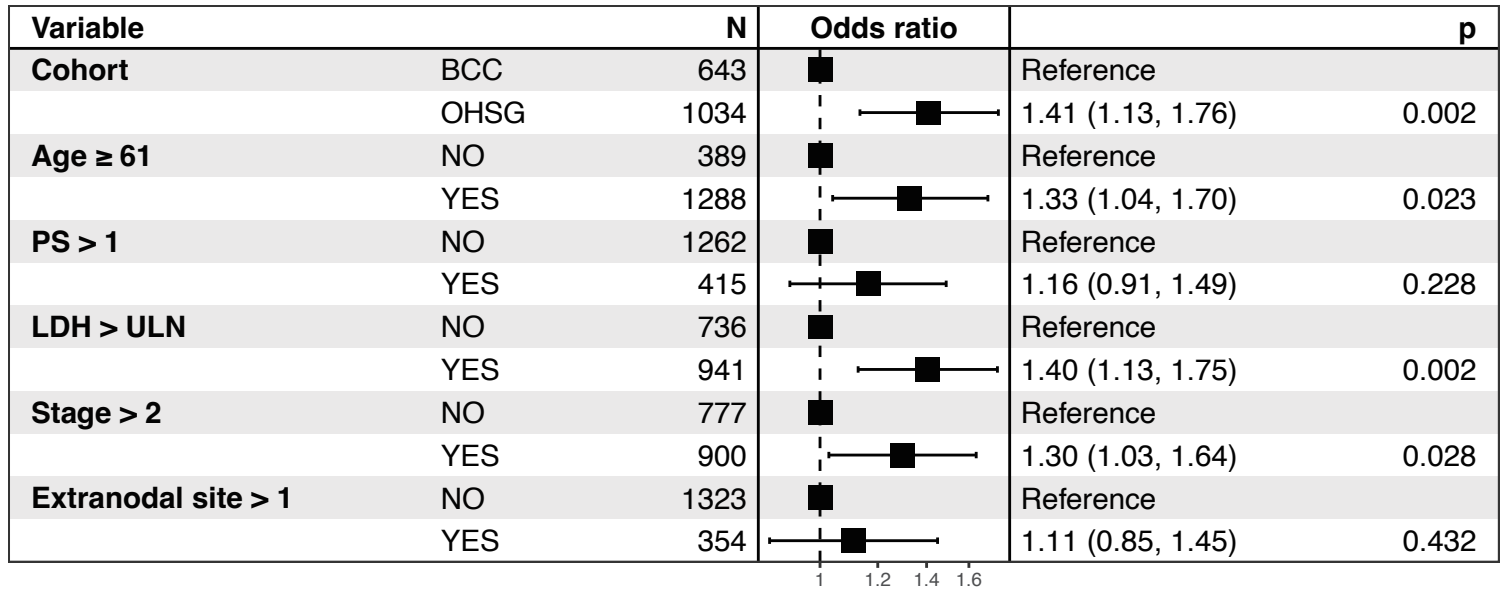

**Supplemental Figure 3 : Associations of the COO distributions in OHSG and BCC cohorts with clinical factors based on multivariable logistic regression models.** Forest plots showing the comparison of odds ratios adjusted for the cohorts and age group (top), and for the cohort, age group and other IPI factors (bottom). COO: cell-of-origin, BCC: BC Cancer, OHSG: Okayama Hematology Study Group

## Supplemental Figure 4

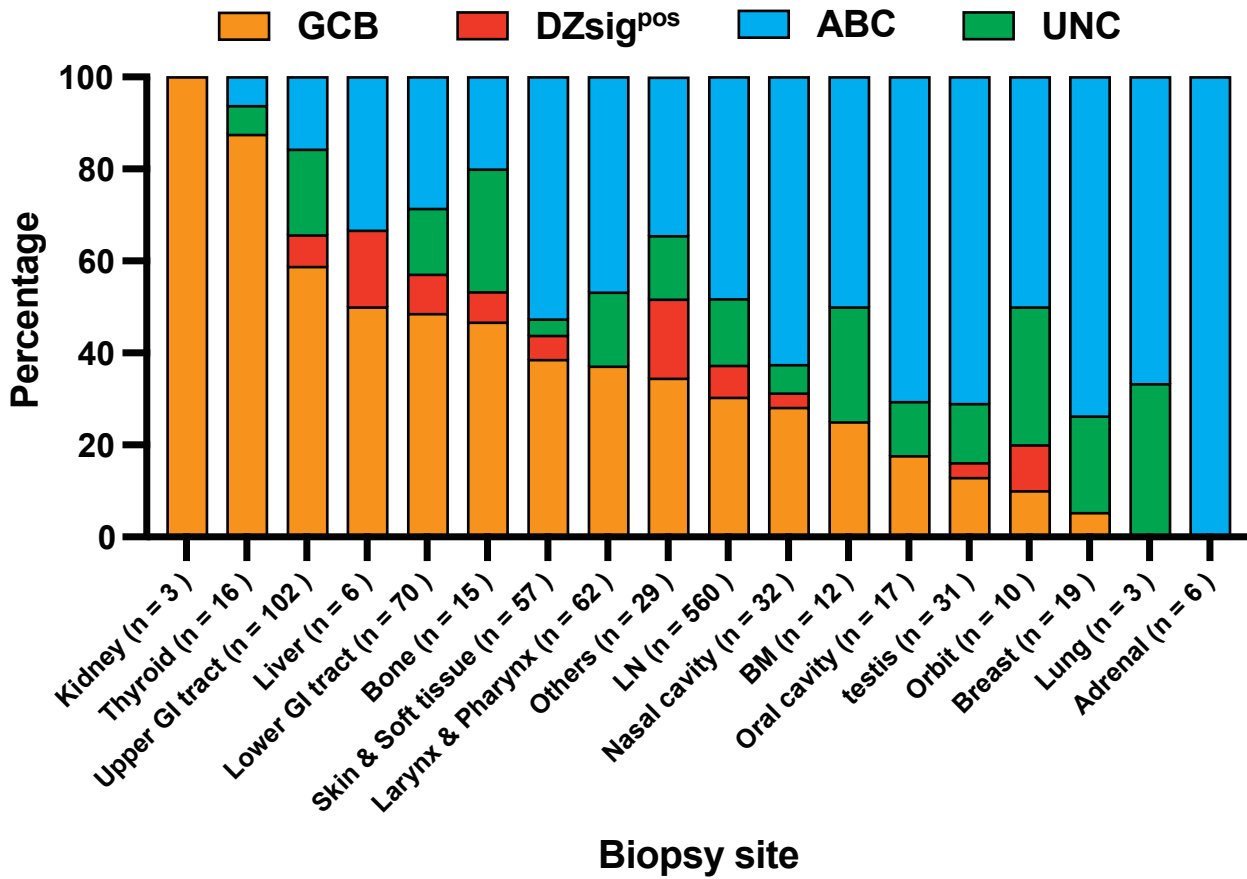

**Supplemental Figure 4: Distribution of refined cell-of-origin (COO) according to biopsy sites.** Bar plots represent the frequency of refined COO in each biopsy site. ABC: activated B-cell-like, DZsig: dark zone signature, GCB: germinal center B-cell-like, pos: positive, UNC: unclassified, GI tract: gastrointestinal tract



## Supplemental Figure 5

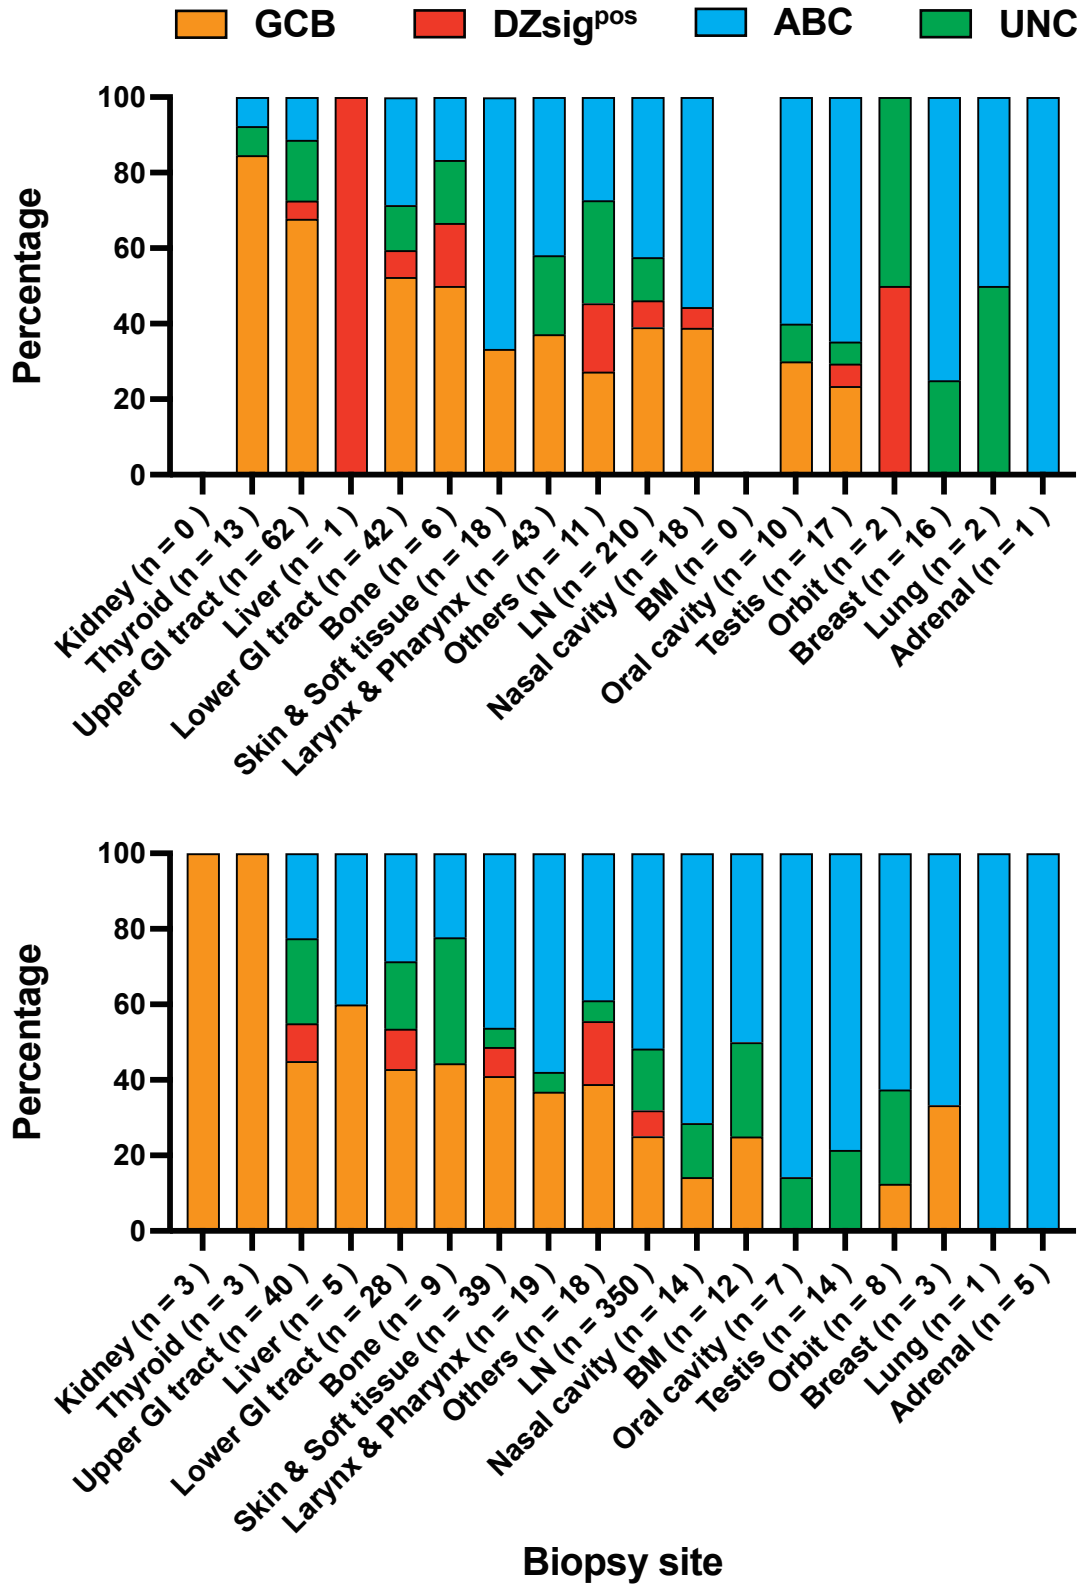

**Supplemental Figure 5: Distribution of refined cell-of-origin (COO) according to biopsy sites.** Bar plots represent the frequency of refined COO of patients with stage I/II (top) and III/IV (bottom) in each biopsy site. ABC: activated B-cell-like, DZsig: dark zone signature, GCB: germinal center B-cell-like, pos: positive, UNC: unclassified, GI tract: gastrointestinal tract

# Supplemental Figure 6

A

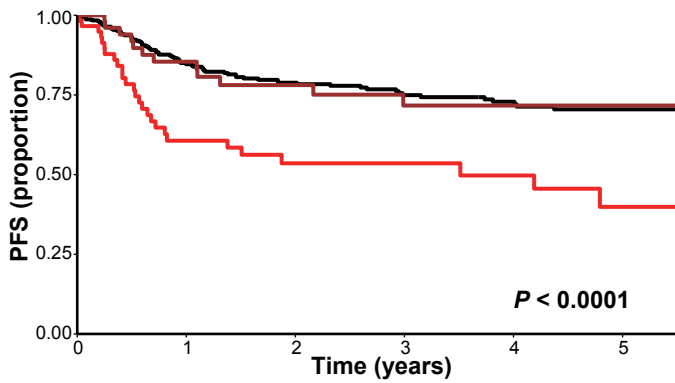

| Number at risk |                                |     |                   |     |                  |    |  |
|----------------|--------------------------------|-----|-------------------|-----|------------------|----|--|
| —              | 313                            | 221 | 172               | 122 | 95               | 73 |  |
| —              | 54                             | 36  | 26                | 21  | 18               | 15 |  |
| —              | 59                             | 29  | 20                | 15  | 12               | 6  |  |
| —              | DZsig <sup>neg</sup> (n = 313) |     | 2y-PFS (95% CI)   |     | HR (95% CI)      |    |  |
| —              | DZsig <sup>ind</sup> (n = 54)  |     | 78.8% (74.1-83.9) |     | 1                |    |  |
| —              | DZsig <sup>pos</sup> (n = 59)  |     | 78.1% (66.9-91.2) |     | 0.99 (0.56-1.75) |    |  |
|                |                                |     | 53.5% (41.3-69.5) |     | 2.71 (1.78-4.13) |    |  |

B

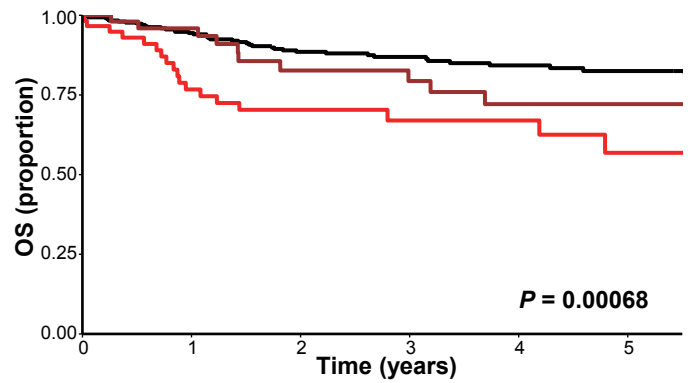

| Number at risk |                                |     |                   |     |                  |    |  |
|----------------|--------------------------------|-----|-------------------|-----|------------------|----|--|
| —              | 313                            | 245 | 192               | 143 | 110              | 86 |  |
| —              | 54                             | 41  | 28                | 24  | 19               | 15 |  |
| —              | 59                             | 37  | 26                | 19  | 15               | 9  |  |
| —              | DZsig <sup>neg</sup> (n = 313) |     | 2y-OS (95% CI)    |     | HR (95% CI)      |    |  |
| —              | DZsig <sup>ind</sup> (n = 54)  |     | 88.5% (84.7-92.5) |     | 1                |    |  |
| —              | DZsig <sup>pos</sup> (n = 59)  |     | 82.7% (71.6-95.4) |     | 1.47 (0.78-2.76) |    |  |
|                |                                |     | 70.3% (58.7-84.3) |     | 2.67 (1.58-4.50) |    |  |

C

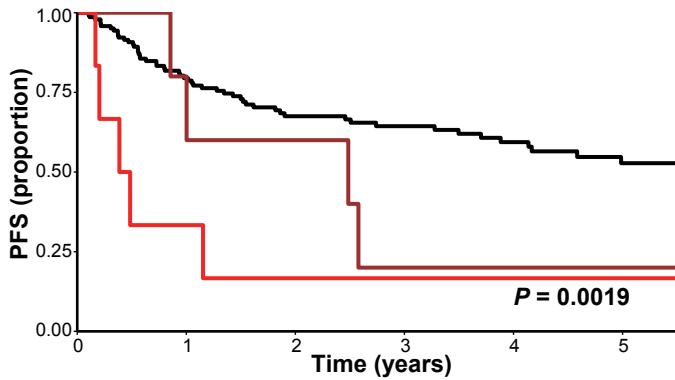

| Number at risk |                                |     |                    |    |                  |    |  |
|----------------|--------------------------------|-----|--------------------|----|------------------|----|--|
| —              | 145                            | 103 | 71                 | 57 | 42               | 27 |  |
| —              | 5                              | 4   | 3                  | 1  | 1                | 1  |  |
| —              | 6                              | 2   | 1                  | 1  | 1                | 1  |  |
| —              | DZsig <sup>neg</sup> (n = 145) |     | 2y-PFS (95% CI)    |    | HR (95% CI)      |    |  |
| —              | DZsig <sup>ind</sup> (n = 5)   |     | 67.5% (59.8-76.2)  |    | 1                |    |  |
| —              | DZsig <sup>pos</sup> (n = 6)   |     | 60.0% (29.3-100.0) |    | 2.05 (0.74-5.67) |    |  |
|                |                                |     | 16.7% (2.8-99.7)   |    | 4.25 (1.69-10.7) |    |  |

D

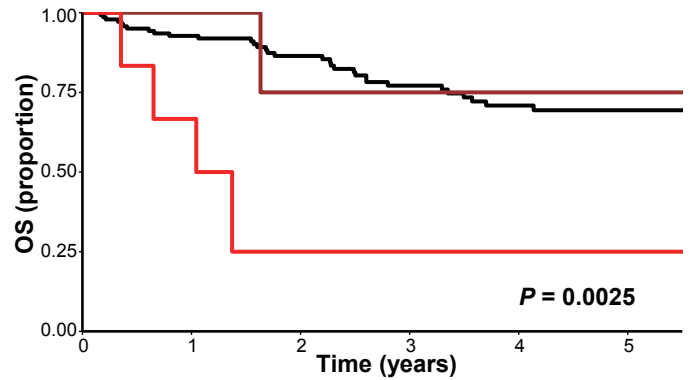

| Number at risk |                                |     |                    |    |                  |    |  |
|----------------|--------------------------------|-----|--------------------|----|------------------|----|--|
| —              | 145                            | 119 | 89                 | 66 | 50               | 36 |  |
| —              | 5                              | 5   | 3                  | 3  | 2                | 1  |  |
| —              | 6                              | 4   | 1                  | 1  | 1                | 1  |  |
| —              | DZsig <sup>neg</sup> (n = 145) |     | 2y-OS (95% CI)     |    | HR (95% CI)      |    |  |
| —              | DZsig <sup>ind</sup> (n = 5)   |     | 86.4% (80.6-92.7)  |    | 1                |    |  |
| —              | DZsig <sup>pos</sup> (n = 6)   |     | 75.0% (42.6-100.0) |    | 0.76 (0.10-5.59) |    |  |
|                |                                |     | 25.0% (5.0-100.0)  |    | 5.18 (1.81-14.8) |    |  |

**Supplemental Figure 4: Prognostic association of dark zone signature (DZsig) within each cell-of-origin (COO).** Kaplan–Meier curves showing progression-free survival (PFS) and overall survival (OS) according to DZsig in patients with germinal center B-cell-like (GCB) tumors (A, B) and unclassified (UNC) tumors (C,D). ind: indeterminate, neg: negative, pos: positive

# Supplemental Figure 7

**A**

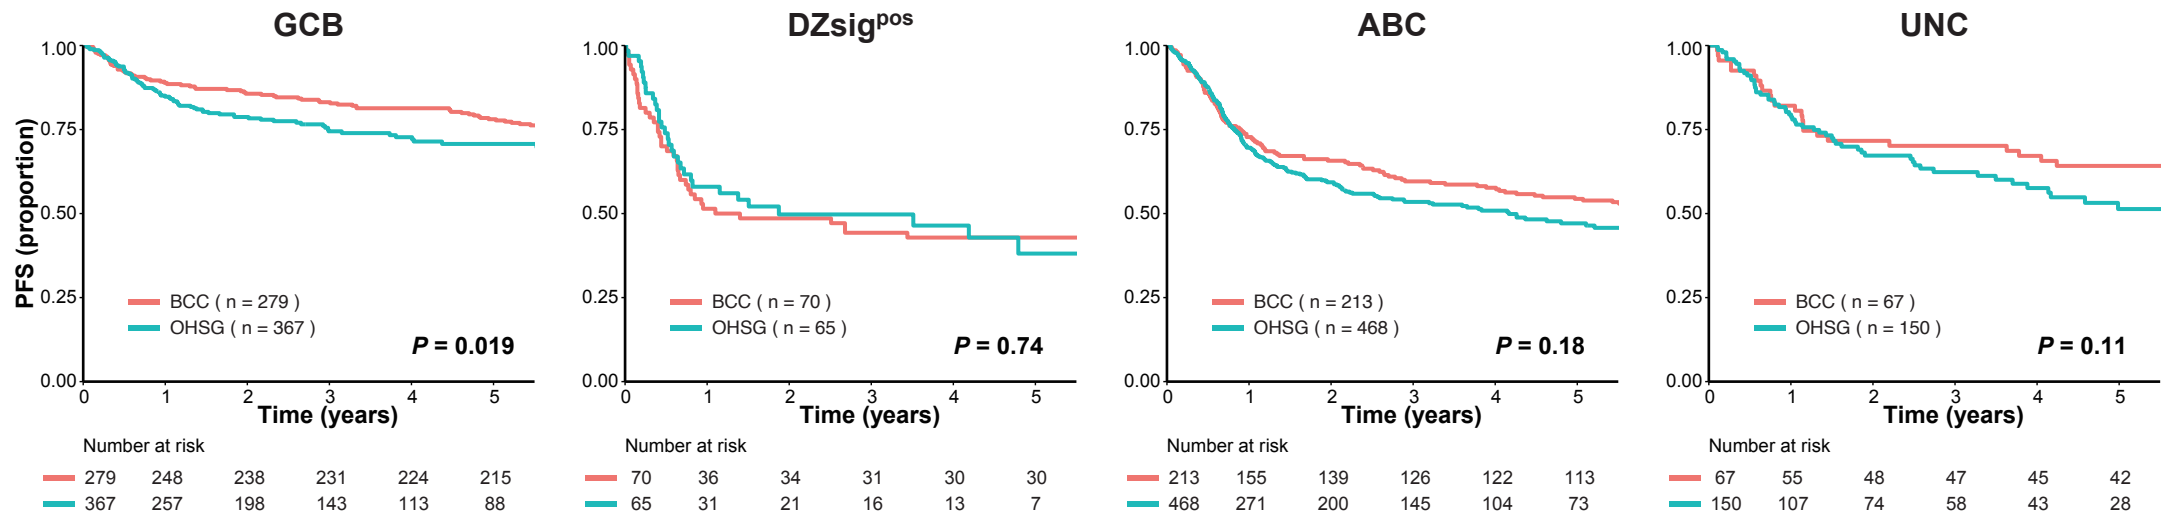

**B**

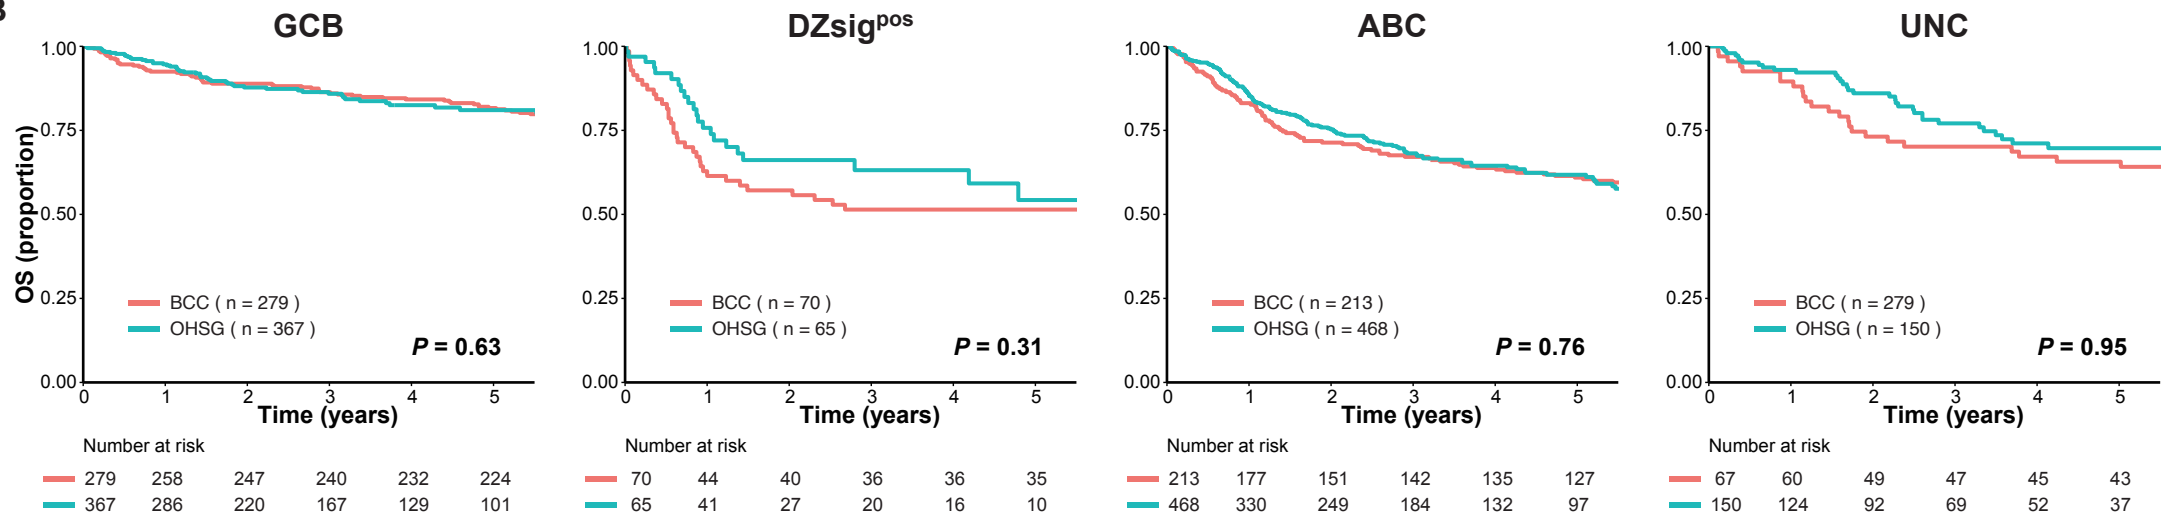

**Supplemental Figure 7: Comparison of survival outcomes with each refined cell-of-origin according to cohorts. ABC: activated B-cell-like, BCC: BC Cancer, DZsig: dark zone signature, GCB: germinal center B-cell-like, OHSG: Okayama Hematology Study Group, pos: positive, UNC: unclassified**

# Supplemental Figure 8

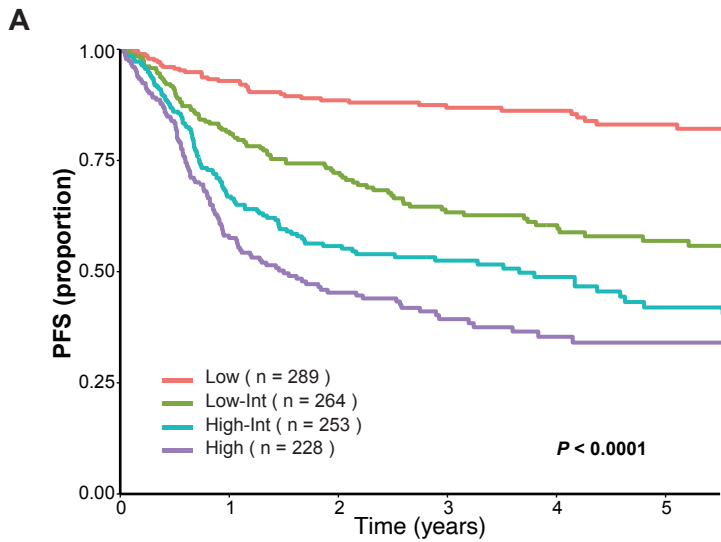

| Number at risk         |     |     |     |     |     |    |
|------------------------|-----|-----|-----|-----|-----|----|
|                        | 0   | 1   | 2   | 3   | 4   | 5  |
| — Low ( n = 289 )      | 289 | 228 | 182 | 145 | 116 | 89 |
| — Low-Int ( n = 264 )  | 264 | 177 | 135 | 99  | 76  | 54 |
| — High-Int ( n = 253 ) | 253 | 144 | 97  | 67  | 48  | 33 |
| — High ( n = 228 )     | 228 | 107 | 71  | 44  | 27  | 15 |

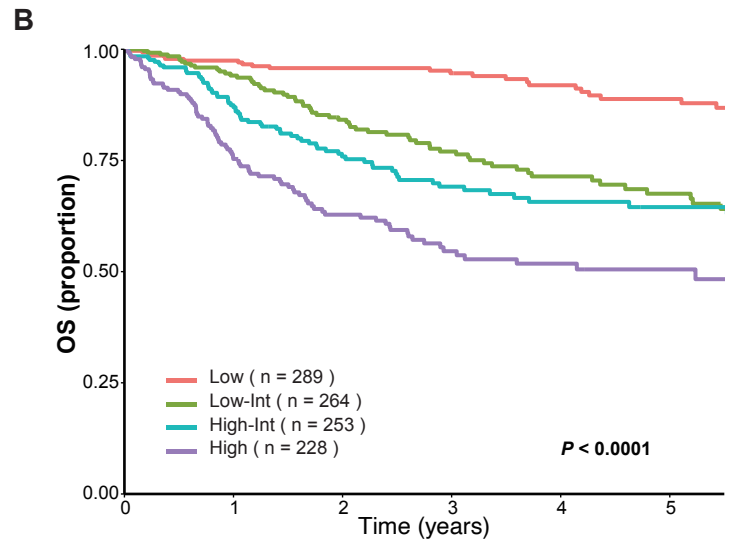

| Number at risk         |     |     |     |     |     |    |
|------------------------|-----|-----|-----|-----|-----|----|
|                        | 0   | 1   | 2   | 3   | 4   | 5  |
| — Low ( n = 289 )      | 289 | 238 | 197 | 160 | 124 | 96 |
| — Low-Int ( n = 264 )  | 264 | 204 | 157 | 121 | 88  | 64 |
| — High-Int ( n = 253 ) | 253 | 187 | 126 | 89  | 66  | 52 |
| — High ( n = 228 )     | 228 | 139 | 97  | 60  | 42  | 24 |

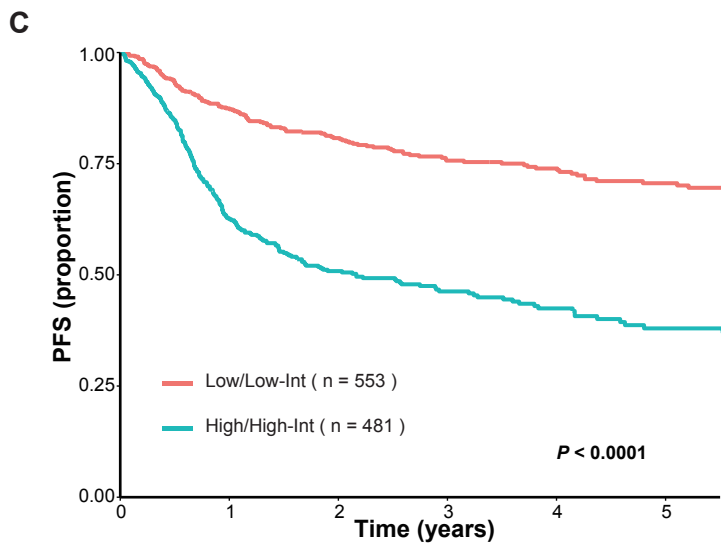

| Number at risk              |     |     |     |     |     |     |
|-----------------------------|-----|-----|-----|-----|-----|-----|
|                             | 0   | 1   | 2   | 3   | 4   | 5   |
| — Low/Low-Int ( n = 553 )   | 553 | 405 | 317 | 244 | 192 | 143 |
| — High/High-Int ( n = 481 ) | 481 | 251 | 168 | 111 | 75  | 48  |

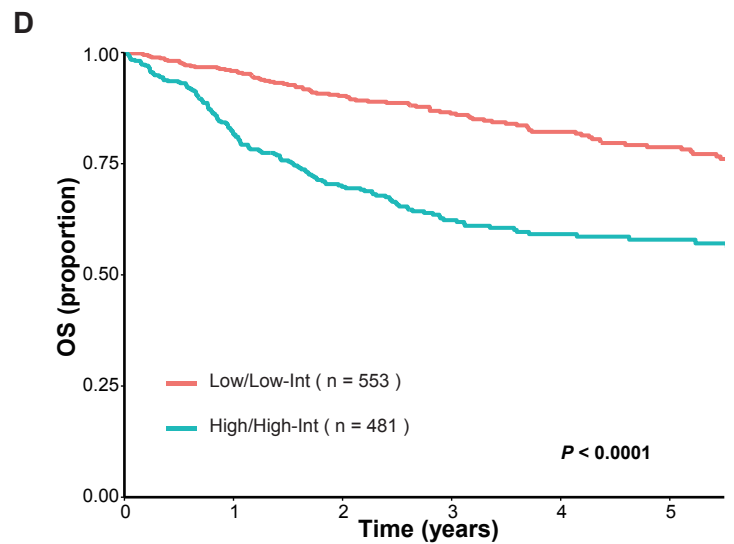

| Number at risk              |     |     |     |     |     |     |
|-----------------------------|-----|-----|-----|-----|-----|-----|
|                             | 0   | 1   | 2   | 3   | 4   | 5   |
| — Low/Low-Int ( n = 553 )   | 553 | 442 | 354 | 281 | 212 | 160 |
| — High/High-Int ( n = 481 ) | 481 | 326 | 223 | 149 | 108 | 76  |

**Supplemental Figure 8: Progression free survival (PFS) and overall survival (OS) stratified by international prognostic index (IPI).** Kaplan–Meier curves showing PFS and OS according to each IPI group (A, B) and two IPI risk groups (C, D): low/low-intermediate risk IPI group and high/high-intermediate risk IPI group. Int: intermediate

# Supplemental Figure 9

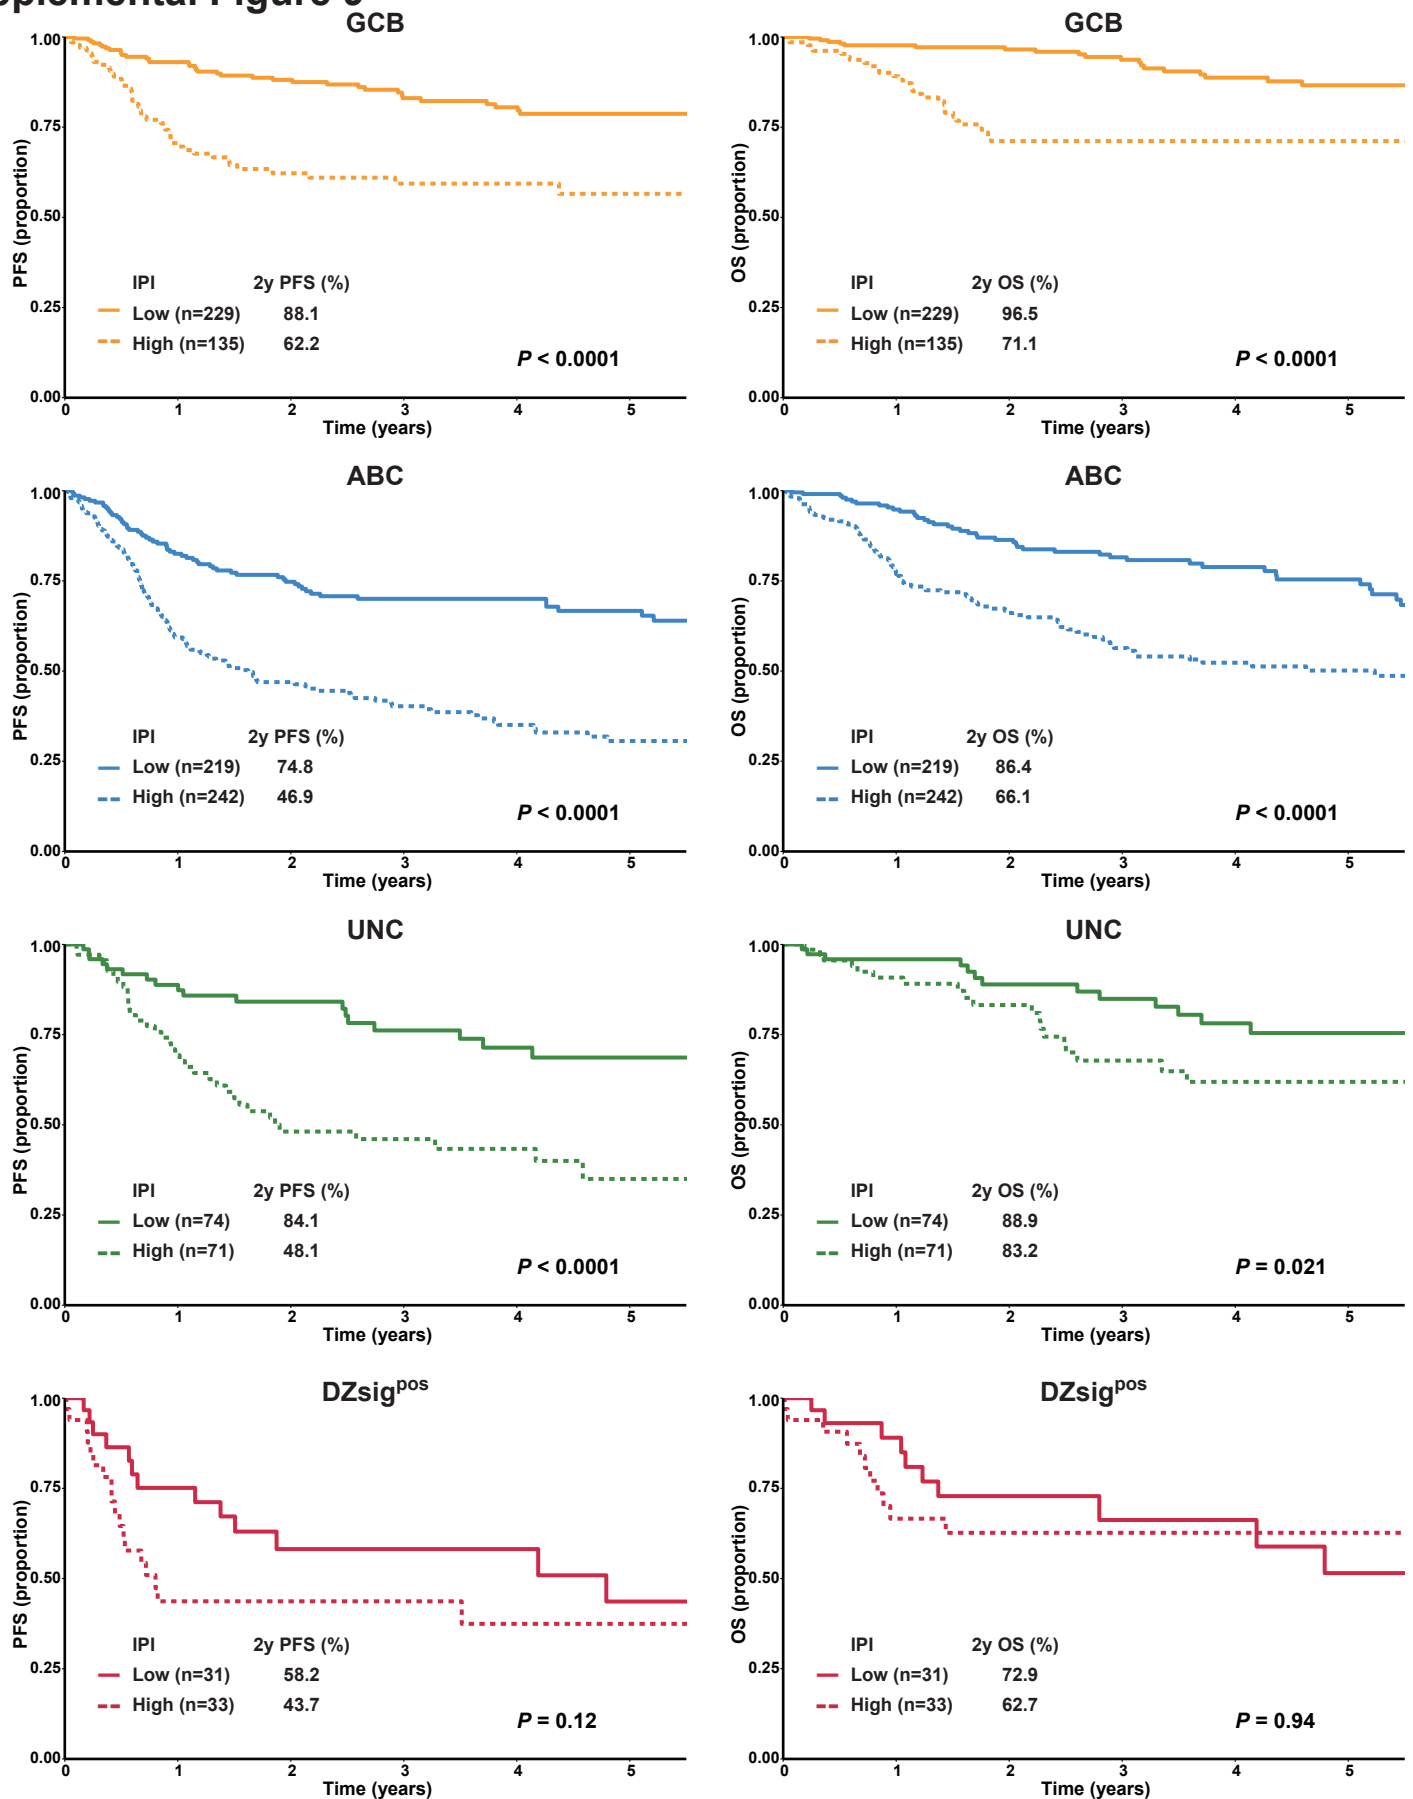

**Supplemental Figure 9: Progression free survival (PFS) and overall survival (OS) in patients with each refined cell-of-origin stratified by international prognostic index (IPI).** Kaplan–Meier curves showing PFS and OS according to IPI risk groups: low/low-intermediate risk IPI group (Low) and high/high-intermediate risk IPI group (High). ABC: activated B-cell-like, DZsig: dark zone signature, GCB: germinal center B-cell-like, pos: positive, UNC: unclassified

# Supplemental Figure 10

**A**

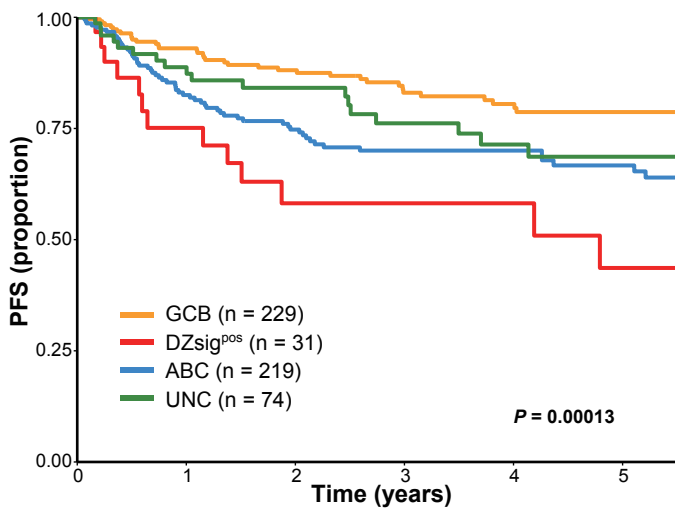

| Number at risk                |     |     |     |     |    |    |
|-------------------------------|-----|-----|-----|-----|----|----|
|                               | 0   | 1   | 2   | 3   | 4  | 5  |
| GCB (n = 229)                 | 229 | 181 | 144 | 106 | 89 | 69 |
| DZsig <sup>pos</sup> (n = 31) | 31  | 19  | 12  | 9   | 8  | 5  |
| ABC (n = 219)                 | 219 | 145 | 116 | 92  | 68 | 50 |
| UNC (n = 74)                  | 74  | 60  | 45  | 37  | 27 | 19 |

**B**

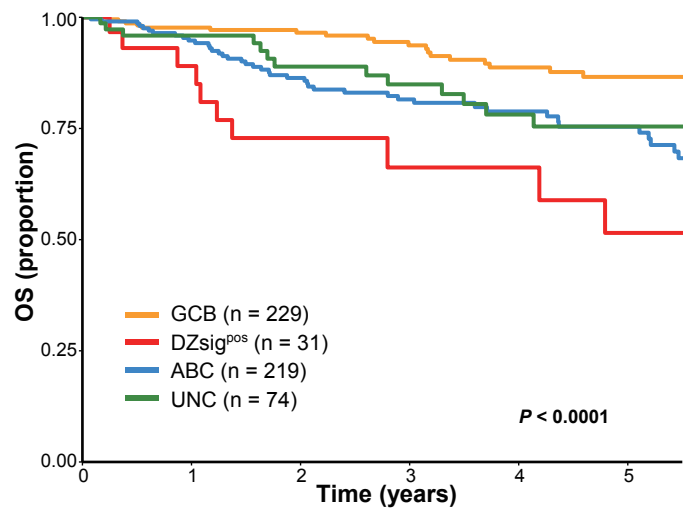

| Number at risk                |     |     |     |     |    |    |
|-------------------------------|-----|-----|-----|-----|----|----|
|                               | 0   | 1   | 2   | 3   | 4  | 5  |
| GCB (n = 229)                 | 229 | 189 | 158 | 122 | 97 | 76 |
| DZsig <sup>pos</sup> (n = 31) | 31  | 22  | 14  | 10  | 9  | 6  |
| ABC (n = 219)                 | 219 | 166 | 134 | 107 | 76 | 56 |
| UNC (n = 74)                  | 74  | 65  | 48  | 42  | 30 | 22 |

**C**

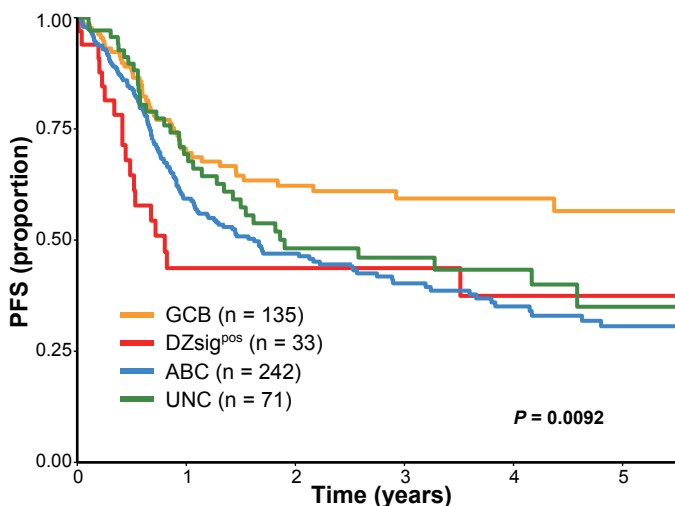

| Number at risk                |     |     |    |    |    |    |
|-------------------------------|-----|-----|----|----|----|----|
|                               | 0   | 1   | 2  | 3  | 4  | 5  |
| GCB (n = 135)                 | 135 | 73  | 52 | 35 | 22 | 17 |
| DZsig <sup>pos</sup> (n = 33) | 33  | 12  | 9  | 7  | 5  | 2  |
| ABC (n = 242)                 | 242 | 123 | 82 | 52 | 35 | 22 |
| UNC (n = 71)                  | 71  | 43  | 25 | 17 | 13 | 7  |

**D**

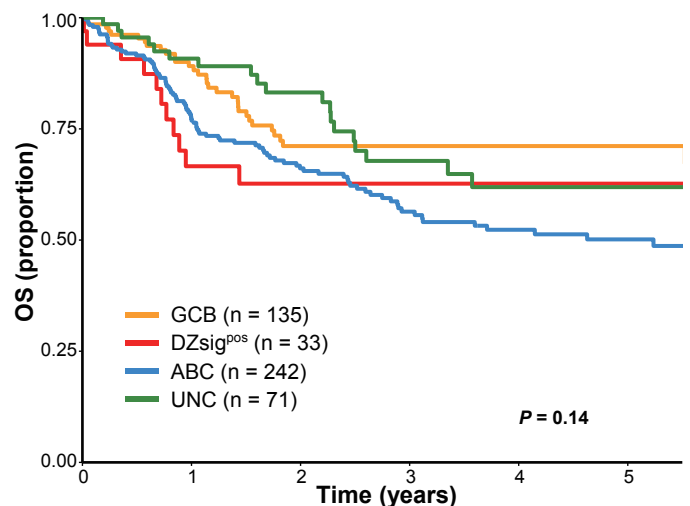

| Number at risk                |     |     |     |    |    |    |
|-------------------------------|-----|-----|-----|----|----|----|
|                               | 0   | 1   | 2   | 3  | 4  | 5  |
| GCB (n = 135)                 | 135 | 94  | 59  | 43 | 30 | 23 |
| DZsig <sup>pos</sup> (n = 33) | 33  | 19  | 13  | 10 | 7  | 4  |
| ABC (n = 242)                 | 242 | 158 | 111 | 73 | 53 | 38 |
| UNC (n = 71)                  | 71  | 55  | 40  | 23 | 18 | 11 |

**Supplemental Figure 10: Prognostic association of refined cell-of-origin stratified by international prognostic index (IPI).** (A, B) Kaplan–Meier curves showing PFS (A) and OS (B) for the low/low-intermediate risk IPI group. (C, D) Kaplan–Meier curves showing PFS (C) and OS (D) for the high/high-intermediate risk IPI group. ABC: activated B-cell-like, DZsig: dark zone signature, GCB: germinal center B-cell-like, pos: positive, UNC: unclassified

## Supplemental Figure 11

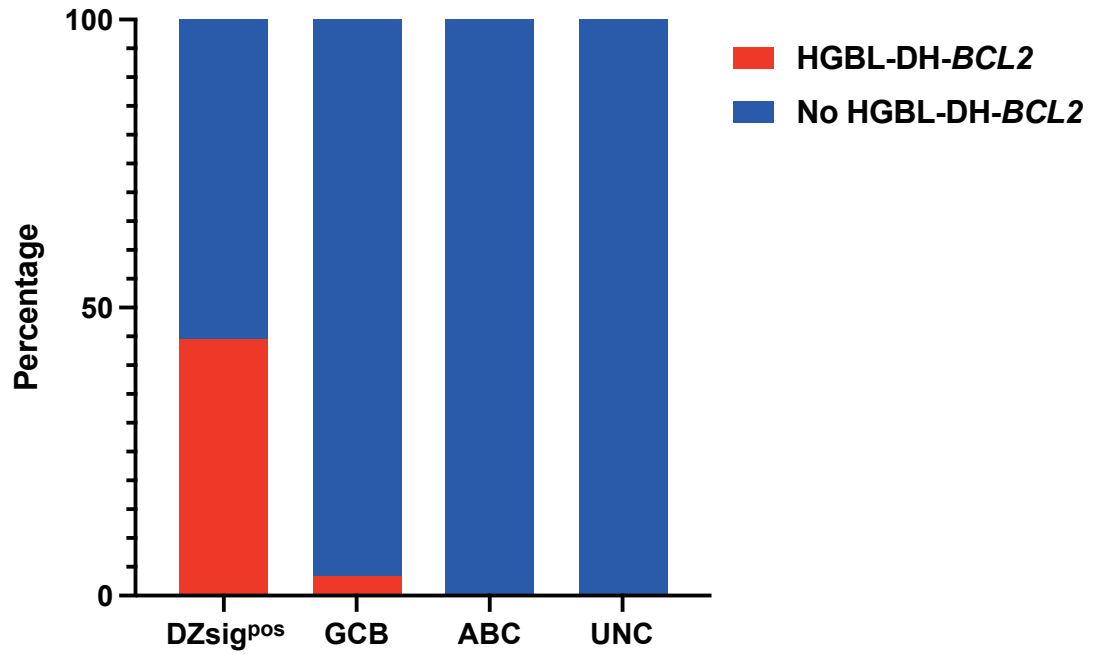

**Supplemental Figure 11: The proportion of high-grade B-cell lymphoma with *MYC* and *BCL2* rearrangements (HGBL-DH-*BCL2*) in each class. ABC: activated B-cell-like, GCB: germinal center B-cell-like, DZsig<sup>pos</sup>: dark zone signature positive, UNC: unclassified**
